# Supplementary material
Source: PubMed Central journal article supplement (PMC4170523)
Supplement: NIHMS618567-supplement-1.pdf [file NIHMS618567-supplement-1.pdf]

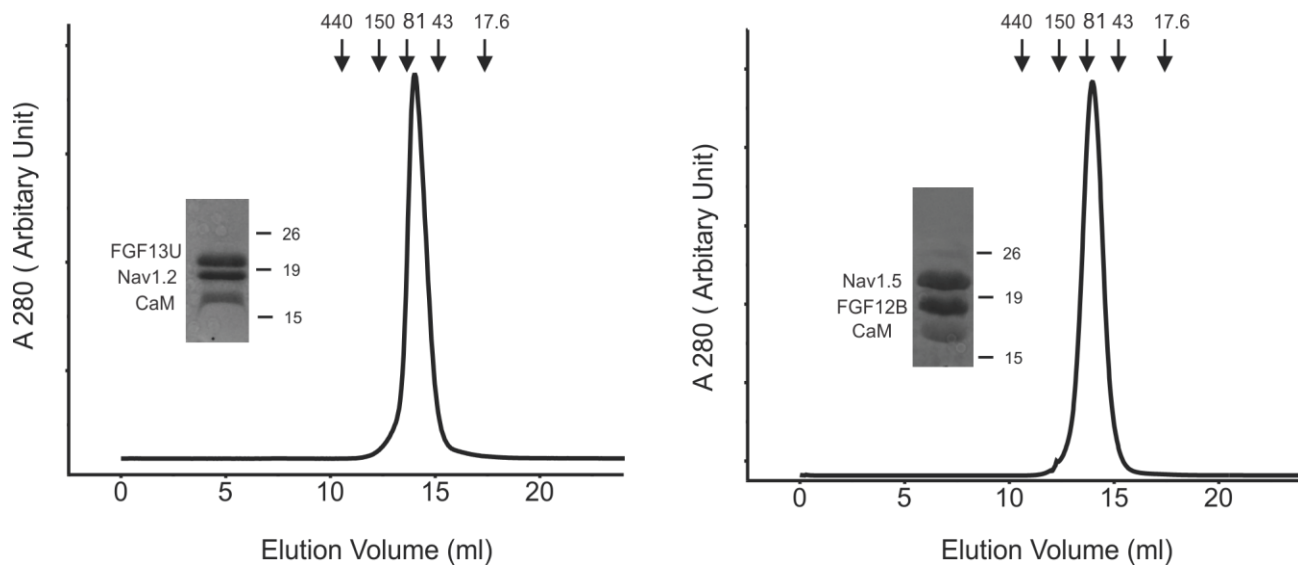

**Supplementary Figure 1:** Gel filtration chromatography profiles of the ternary complex of Na<sub>v</sub>1.2 CTD, FGF13U, and Ca<sup>2+</sup>/CaM (left); Na<sub>v</sub>1.5 CTD, FGF12B, and Ca<sup>2+</sup>/CaM (Right). Migration of standards (Ferritin, MW 440 kDa; Human IgG, MW 150 kDa; Human transferrin, MW 81 kDa; Ovalbumin, MW 43 kDa; and Myoglobin, MW 17.6 kDa) is indicated by arrows. The inset shows Coomassie blue-stained samples from the peak fractions used for crystallization. Molecular weight markers are indicated.

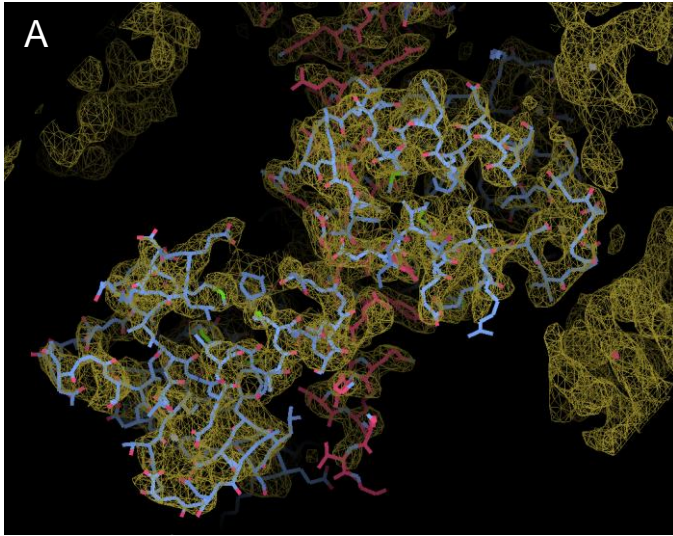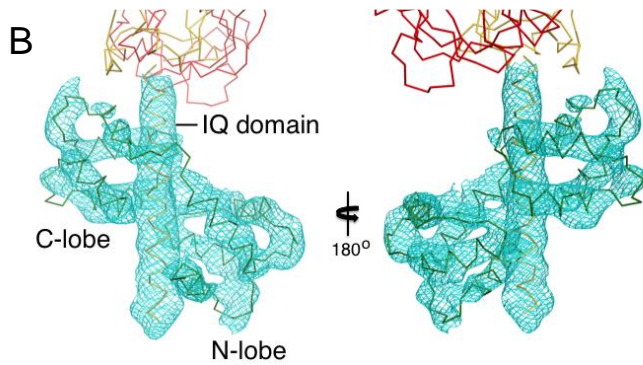

**Supplementary Figure 2: A.** Experimental phasing of the Na<sub>v</sub>1.2 CTD/FGF13/Ca<sup>2+</sup>-CaM crystal. The electron density peaks, contoured at 1 $\sigma$ , are shown in yellow mesh. Phases were obtained by single anomalous dispersion (SAD) from a SeMet-substituted crystal followed by density modification. The final model containing CaM (cyan) and Na<sub>v</sub>1.2 CTD (red) is shown. **B.** 2Fo-Fc OMIT map of Na<sub>v</sub>1.5/Ca<sup>2+</sup>. The map was calculated using phases derived from the final model without CaM. The final models for CaM (green), Nav1.5 CTD (yellow), and FHF (red) are shown in C $\alpha$ .

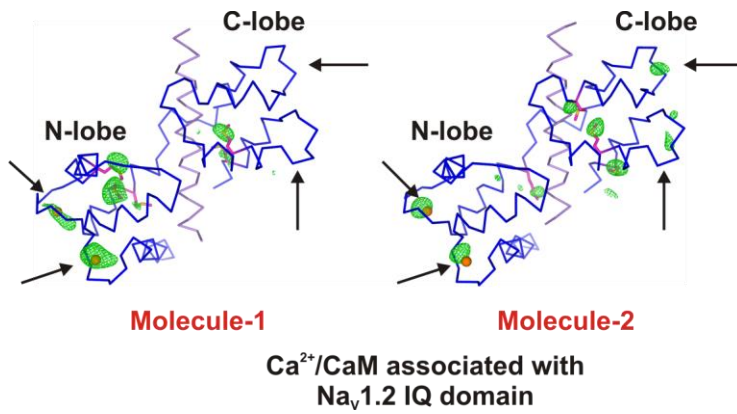

**Supplementary Figure 3: Identification of Ca<sup>2+</sup> within CaM.** Anomalous difference Fourier map for two CaMs and in the asymmetric unit from the Na<sub>v</sub>1.2/+Ca<sup>2+</sup> crystal. The map was calculated using data from 25.0 Å- 5.5 Å of the native crystal using the final model phases. The anomalous difference peaks, colored in green mesh, are contoured at 2.8  $\sigma$ . The arrows indicate the expected positions of Ca<sup>2+</sup> in CaM. Side-chains of methionines are shown. Ca<sup>2+</sup> is shown as a red ball.

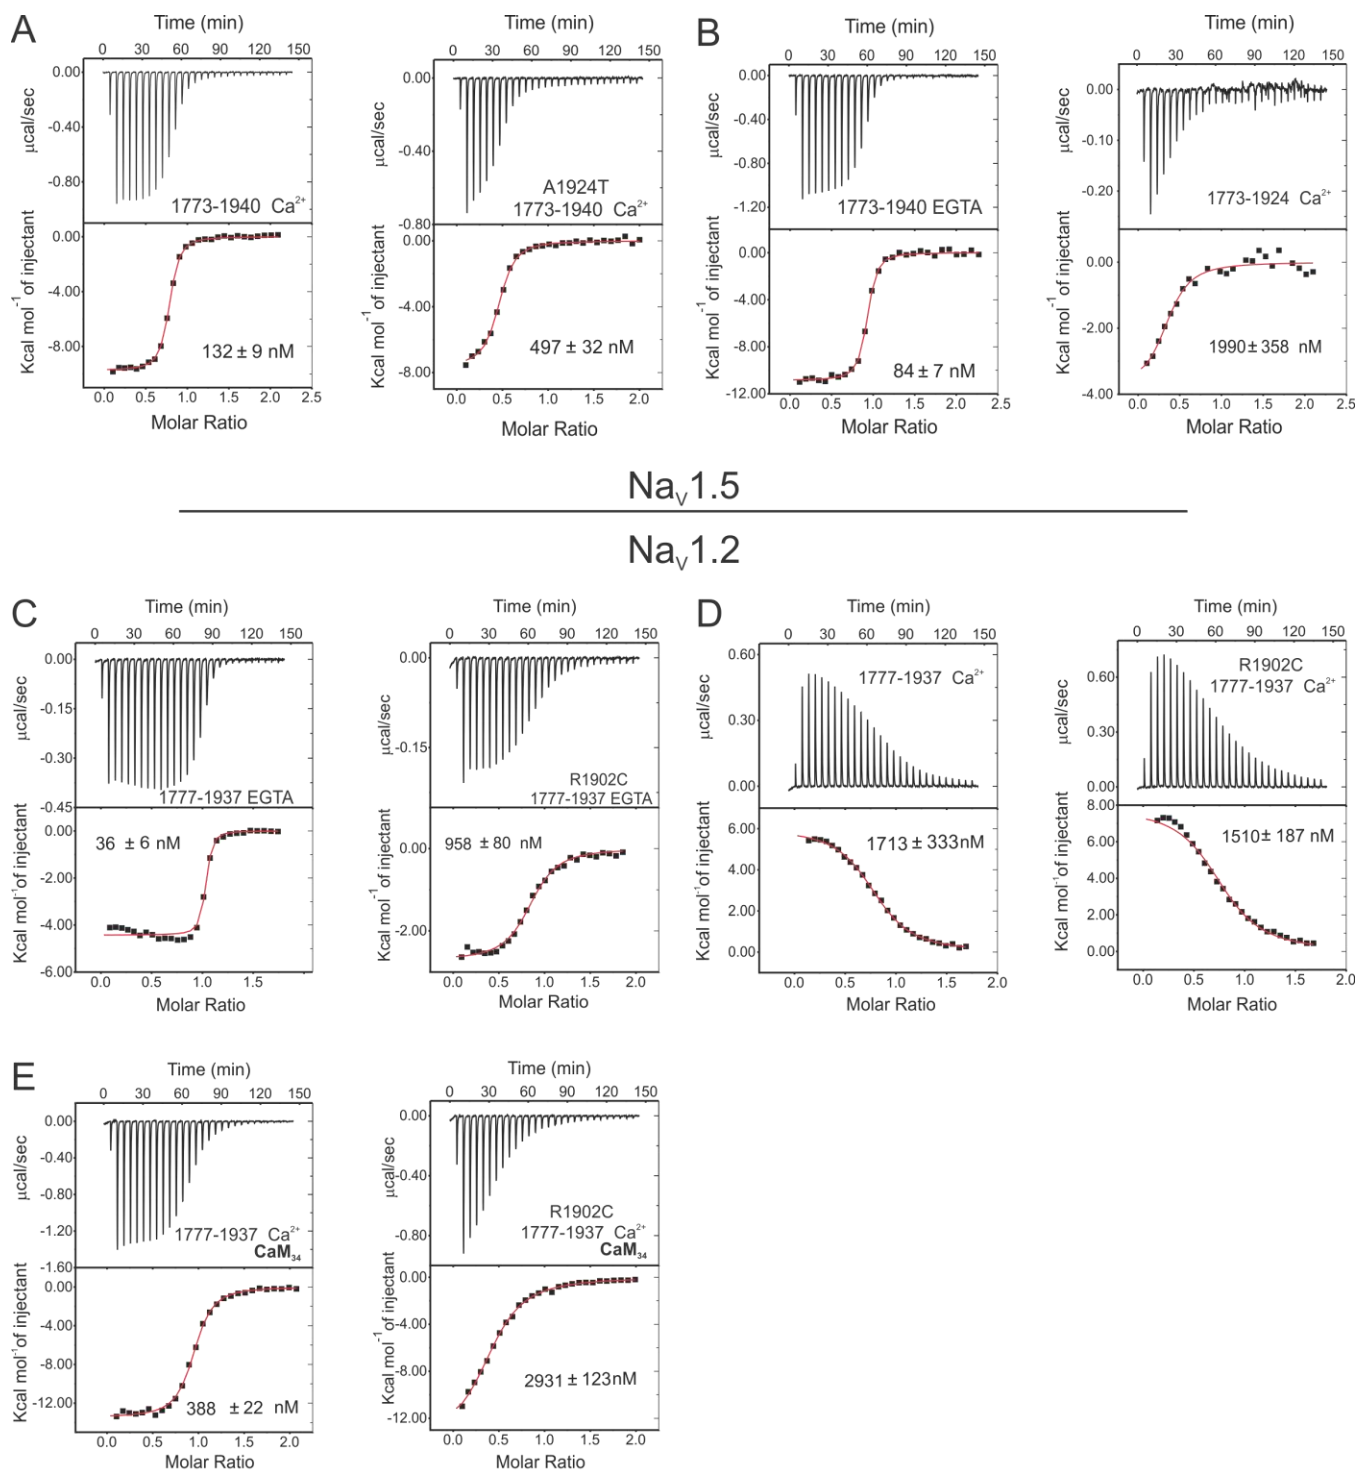

**Supplementary Figure 4: Exemplar ITC data for CaM – Na<sub>v</sub> CTD interactions.** See Tables 1 and 2 in the main text for specific fitting parameters.

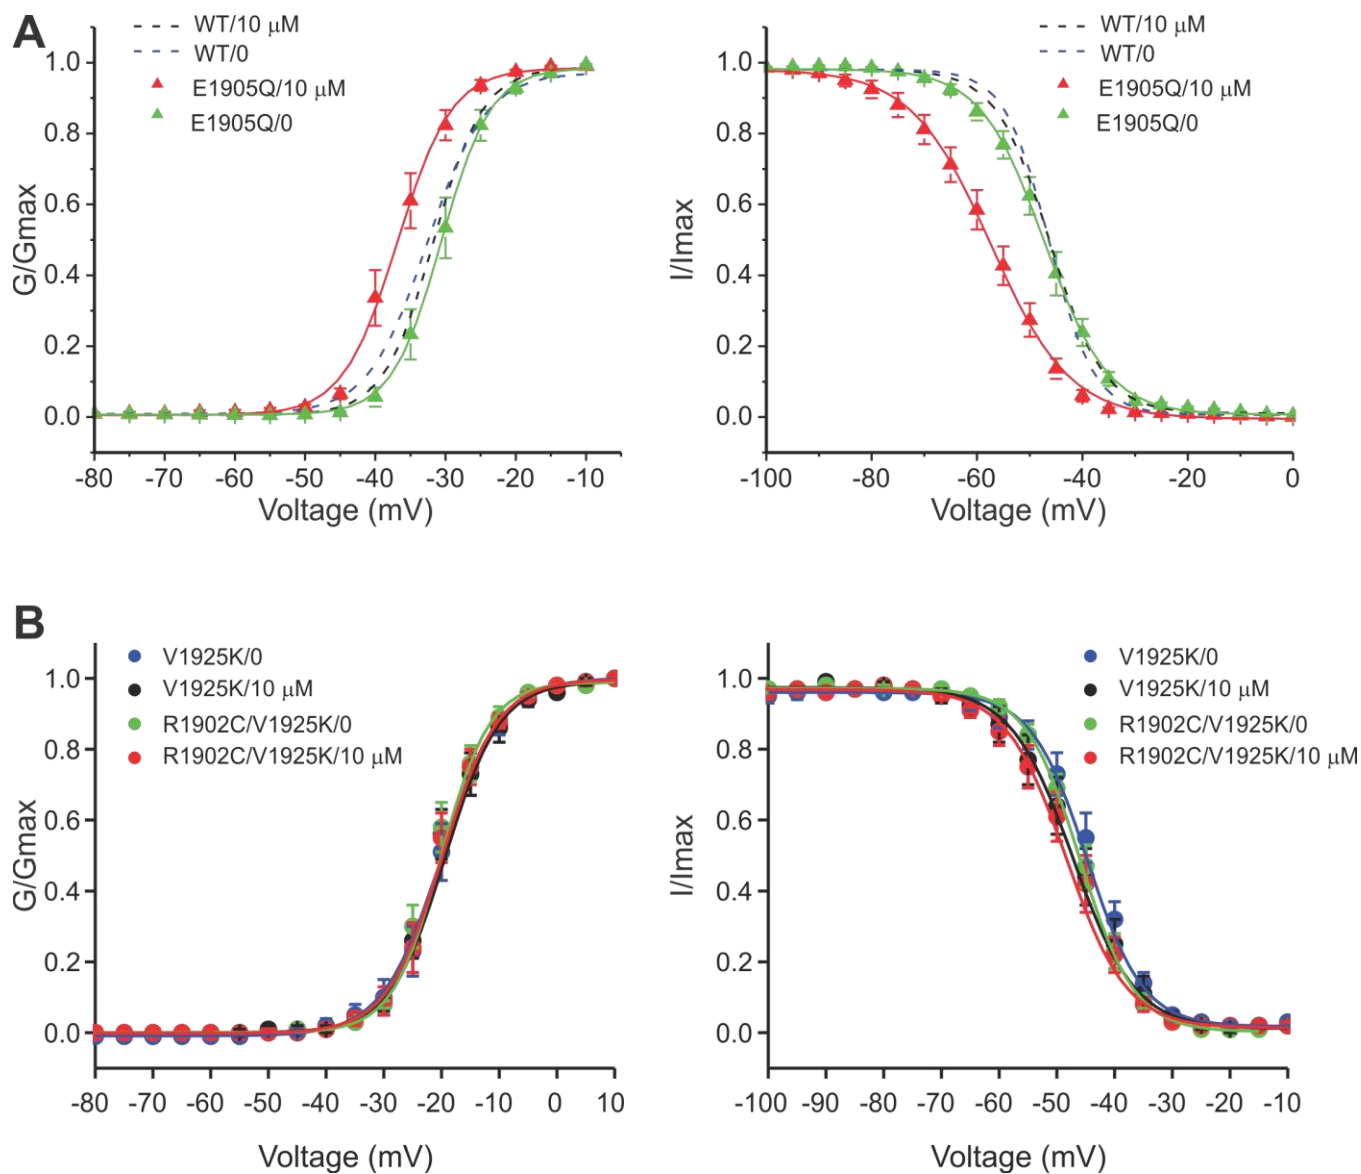

**Supplementary Figure 5: Electrophysiological characterization of Na<sub>v</sub>1.2 mutants. A.**, Activation and steady-state inactivation relationships in 0 mM Ca<sup>2+</sup> or 10  $\mu$ M free Ca<sup>2+</sup> in the recording pipette for E1905Q mutant. The data for wild type are repeated from Fig. 3. See Supp. Table 2 for parameters. **B.**, Activation and steady-state inactivation relationships in 0 mM Ca<sup>2+</sup> or 10  $\mu$ M free Ca<sup>2+</sup> in the recording pipette for V1925K and the double mutant V1925K/R1902C. See Supp. Table 2 for parameters.

**Supplementary Table 1. Summary of Electrophysiological Data**

|                   | Free [Ca <sup>2+</sup> ] <sub>i</sub><br>( $\mu$ M) | V <sub>1/2</sub> of activation<br>(mV) | k of activation<br>(pA/mV) | V <sub>1/2</sub> of<br>inactivation (mV) | k of inactivation<br>(pA/mV) | N     |
|-------------------|-----------------------------------------------------|----------------------------------------|----------------------------|------------------------------------------|------------------------------|-------|
| WT                | 0                                                   | -32.6 ± 1.6                            | 1.5 ± 0.2                  | -46.1 ± 0.7                              | 4.0 ± 0.2                    | 14-16 |
|                   | 10                                                  | -31.8 ± 0.9                            | 1.5 ± 0.2                  | -46.1 ± 1.2                              | 3.7 ± 0.1                    | 21-22 |
| R1902C            | 0                                                   | -30.3 ± 1.6                            | 2.0 ± 0.2                  | -47.3 ± 1.5                              | 4.9 ± 0.2                    | 12-13 |
|                   | 10                                                  | -39.2 ± 1.2 *                          | 1.5 ± 0.2                  | -55.0 ± 0.1 *                            | 3.9 ± 0.7                    | 25-27 |
| E1905Q            | 0                                                   | -30.8 ± 1.1                            | 2.3 ± 0.4                  | -47.4 ± 1.3                              | 4.8 ± 0.3                    | 15-16 |
|                   | 10                                                  | -36.8 ± 1.0 *                          | 1.8 ± 0.1                  | -58.1 ± 1.9 *                            | 6.3 ± 0.4                    | 17-18 |
| V1925K            | 0                                                   | -20.2 ± 1.7                            | 3.8 ± 0.4                  | -44.1 ± 1.5                              | 4.5 ± 0.3                    | 10    |
|                   | 10                                                  | -20.3 ± 1.3                            | 4.0 ± 0.4                  | -47.1 ± 2.0                              | 4.5 ± 0.3                    | 8-9   |
| R1902C/<br>V1925K | 0                                                   | -20.8 ± 1.3                            | 3.6 ± 0.3                  | -45.7 ± 1.1                              | 4.3 ± 0.2                    | 10-11 |
|                   | 10                                                  | -20.5 ± 1.4                            | 3.4 ± 0.4                  | -47.5 ± 1.8 *                            | 4.4 ± 0.3                    | 11    |

\* P < 0.05 vs. Ca<sup>2+</sup> free conditions
